# Supplementary material
Source: PubMed Central journal article supplement (PMC7159087)
Supplement: mmc4.pdf [file mmc4.pdf]

## WHO's budgetary allocations and burden of disease: a comparative analysis

Correspondence to:  
David Stuckler, Department of  
Sociology, University of Oxford,  
Christ Church, Oxford OX1 1DP,  
UK  
david.stuckler@chch.ox.ac.uk

|                                                                          | Classification                                               | Corresponding global burden of disease categories                                                                                                          |
|--------------------------------------------------------------------------|--------------------------------------------------------------|------------------------------------------------------------------------------------------------------------------------------------------------------------|
| <b>Group I: infectious diseases</b>                                      |                                                              |                                                                                                                                                            |
| Communicable disease prevention and control, research, tropical diseases | Communicable diseases except AIDS, tuberculosis, and malaria | Diarrhoeal disease                                                                                                                                         |
| Immunisation and vaccines, blood safety                                  |                                                              | Respiratory infections                                                                                                                                     |
| Epidemic response                                                        |                                                              | Tropical diseases                                                                                                                                          |
| Essential medicines and technologies                                     |                                                              | Sexually transmitted infections excluding HIV, meningitis, hepatitis B, hepatitis C, leprosy, dengue, Japanese encephalitis, intestinal nematode, trachoma |
| HIV/AIDS                                                                 | HIV/AIDS                                                     | HIV/AIDS                                                                                                                                                   |
| Tuberculosis                                                             | Tuberculosis                                                 | Tuberculosis                                                                                                                                               |
| Malaria                                                                  | Malaria                                                      | Malaria                                                                                                                                                    |
| Child and adolescent health                                              | Child and maternal health                                    | Maternal conditions                                                                                                                                        |
| Making pregnancy safer                                                   |                                                              | Perinatal conditions                                                                                                                                       |
| Reproductive health                                                      |                                                              | Childhood infections                                                                                                                                       |
| Nutrition*                                                               | Malnutrition                                                 | Nutritional deficiencies                                                                                                                                   |
| Food safety*                                                             |                                                              |                                                                                                                                                            |
| <b>Group II: non-communicable diseases</b>                               |                                                              |                                                                                                                                                            |
| Non-communicable disease surveillance                                    | Non-communicable diseases                                    | Non-communicable disease                                                                                                                                   |
| Tobacco                                                                  |                                                              |                                                                                                                                                            |
| Health promotion                                                         |                                                              |                                                                                                                                                            |
| Health and environment                                                   |                                                              |                                                                                                                                                            |
| Mental health                                                            |                                                              |                                                                                                                                                            |
| Substance abuse                                                          |                                                              |                                                                                                                                                            |
| <b>Group III: injuries</b>                                               |                                                              |                                                                                                                                                            |
| Injuries, violence, and disability                                       | Injuries                                                     | Injuries                                                                                                                                                   |

Budget lines differed in 2004–05 and 2006–07 budget cycles. \*Subsequent budgets joined nutrition and food safety as work areas with a heavy focus on malnutrition (eg, Global Alliance for Improved Nutrition). See WHO Programme Budget 2004–05 Areas of Work and WHO Programme Budget 2004–05 Performance Assessment Report PBPA/2004–05.

**Webtable 2: Classifications of areas of work and disease categories, 2004–05 (used in figure 1)**
