# Supplementary material
Source: PubMed Central journal article supplement (PMC7159087)
Supplement: mmc5.pdf [file mmc5.pdf]

## WHO's budgetary allocations and burden of disease: a comparative analysis

Correspondence to:  
David Stuckler, Department of  
Sociology, University of Oxford,  
Christ Church, Oxford OX1 1DP,  
UK  
david.stuckler@chch.ox.ac.uk

|                                                                                                                                                                                                                                                                                                                                                                                                                                                                                                                               | Allocation (US\$) | Percentage of total |
|-------------------------------------------------------------------------------------------------------------------------------------------------------------------------------------------------------------------------------------------------------------------------------------------------------------------------------------------------------------------------------------------------------------------------------------------------------------------------------------------------------------------------------|-------------------|---------------------|
| <b>Ten highest contributing member states</b>                                                                                                                                                                                                                                                                                                                                                                                                                                                                                 |                   |                     |
| USA                                                                                                                                                                                                                                                                                                                                                                                                                                                                                                                           | 305 668 404       | 21.5%               |
| UK                                                                                                                                                                                                                                                                                                                                                                                                                                                                                                                            | 303 593 823       | 21.3%               |
| Canada                                                                                                                                                                                                                                                                                                                                                                                                                                                                                                                        | 150 849 285       | 10.6%               |
| Norway                                                                                                                                                                                                                                                                                                                                                                                                                                                                                                                        | 102 395 274       | 7.2%                |
| Sweden                                                                                                                                                                                                                                                                                                                                                                                                                                                                                                                        | 87 274 166        | 6.1%                |
| Netherlands                                                                                                                                                                                                                                                                                                                                                                                                                                                                                                                   | 65 053 198        | 4.6%                |
| Italy                                                                                                                                                                                                                                                                                                                                                                                                                                                                                                                         | 58 924 491        | 4.1%                |
| Japan                                                                                                                                                                                                                                                                                                                                                                                                                                                                                                                         | 46 223 718        | 3.2%                |
| Spain                                                                                                                                                                                                                                                                                                                                                                                                                                                                                                                         | 36 720 013        | 2.6%                |
| Australia                                                                                                                                                                                                                                                                                                                                                                                                                                                                                                                     | 34 979 931        | 2.5%                |
| Total from ten member states                                                                                                                                                                                                                                                                                                                                                                                                                                                                                                  | 1 191 682 303     | 83.8%               |
| Total member states                                                                                                                                                                                                                                                                                                                                                                                                                                                                                                           | 1 422 331 985     | ..                  |
| <b>Ten highest contributing other sources</b>                                                                                                                                                                                                                                                                                                                                                                                                                                                                                 |                   |                     |
| UN*                                                                                                                                                                                                                                                                                                                                                                                                                                                                                                                           | 232 070 782       | 21.6%               |
| Gates Foundation                                                                                                                                                                                                                                                                                                                                                                                                                                                                                                              | 148 174 632       | 13.8%               |
| European Commission                                                                                                                                                                                                                                                                                                                                                                                                                                                                                                           | 128 127 194       | 11.9%               |
| Rotary International                                                                                                                                                                                                                                                                                                                                                                                                                                                                                                          | 27 038 394        | 2.5%                |
| World Bank†                                                                                                                                                                                                                                                                                                                                                                                                                                                                                                                   | 24 204 713        | 2.3%                |
| Novartis, Switzerland                                                                                                                                                                                                                                                                                                                                                                                                                                                                                                         | 11 933 675        | 1.1%                |
| Asian Development Bank                                                                                                                                                                                                                                                                                                                                                                                                                                                                                                        | 10 871 000        | 1.0%                |
| World Lung Foundation                                                                                                                                                                                                                                                                                                                                                                                                                                                                                                         | 10 395 059        | 1.0%                |
| Sanofi-Aventis, France                                                                                                                                                                                                                                                                                                                                                                                                                                                                                                        | 9 909 802         | 0.9%                |
| Kobe Group, Japan                                                                                                                                                                                                                                                                                                                                                                                                                                                                                                             | 9 000 000         | 0.8%                |
| Total from ten sources                                                                                                                                                                                                                                                                                                                                                                                                                                                                                                        | 611 725 251       | 56.9%               |
| Total other sources                                                                                                                                                                                                                                                                                                                                                                                                                                                                                                           | 1 075 731 946     | ..                  |
| <p>See WHO A61/20 pages 3–16 for more details. Other sources include only organisations that contributed more than US\$10 million of a total of 400 contributors during this period. Data do not sum to 100% because of rounding errors. *Excludes funds for UNAIDS and the Global Fund, which WHO administers. The amount drops to \$106 198 595 if funds for emergencies are excluded. †Excludes funds for Global Alliance Vaccine Initiative but includes funds for tropical disease research and reproductive health.</p> |                   |                     |
| <b>Webtable 3: Sources of WHO extra-budgetary contributions, 2006–07</b>                                                                                                                                                                                                                                                                                                                                                                                                                                                      |                   |                     |
